# Supplementary material for: CEP-1347 Dually Targets MDM4 and PKC to Activate p53 and Inhibit the Growth of Uveal Melanoma Cells
Source: MDPI journal article supplement (doi:10.3390/cancers16010118), 2023-12-25
Supplement: s1 [file s1]

Original blots

Figure 1

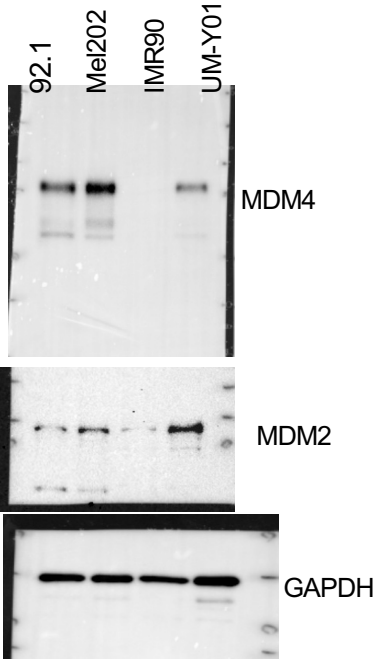

Figure 3A

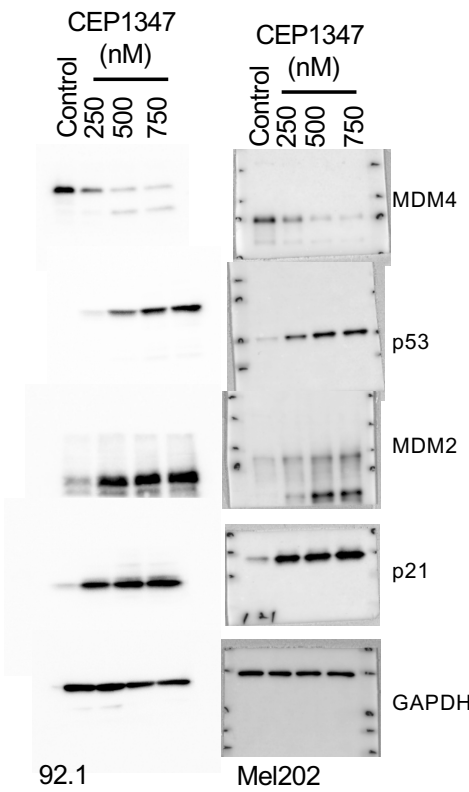

Figure 3B

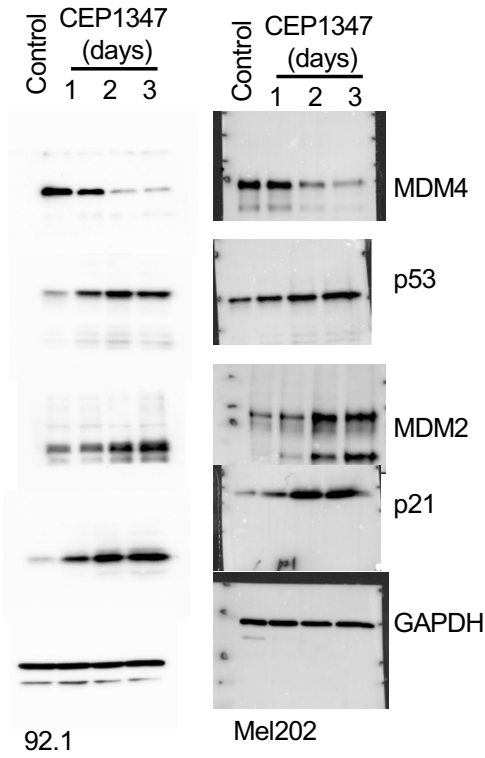

Figure 3C

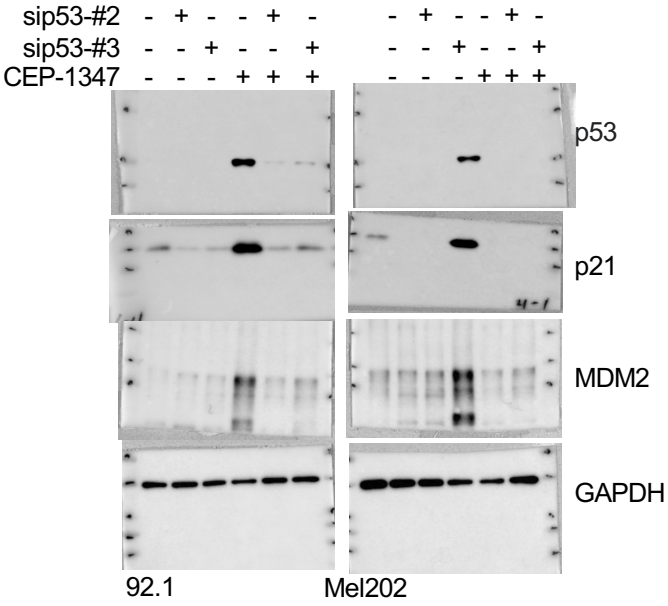

Figure 4A

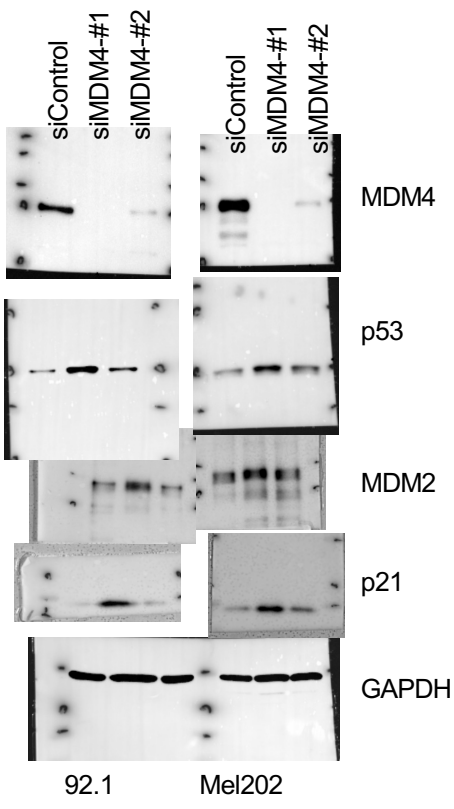

Original blots, contineued

Figure 5A

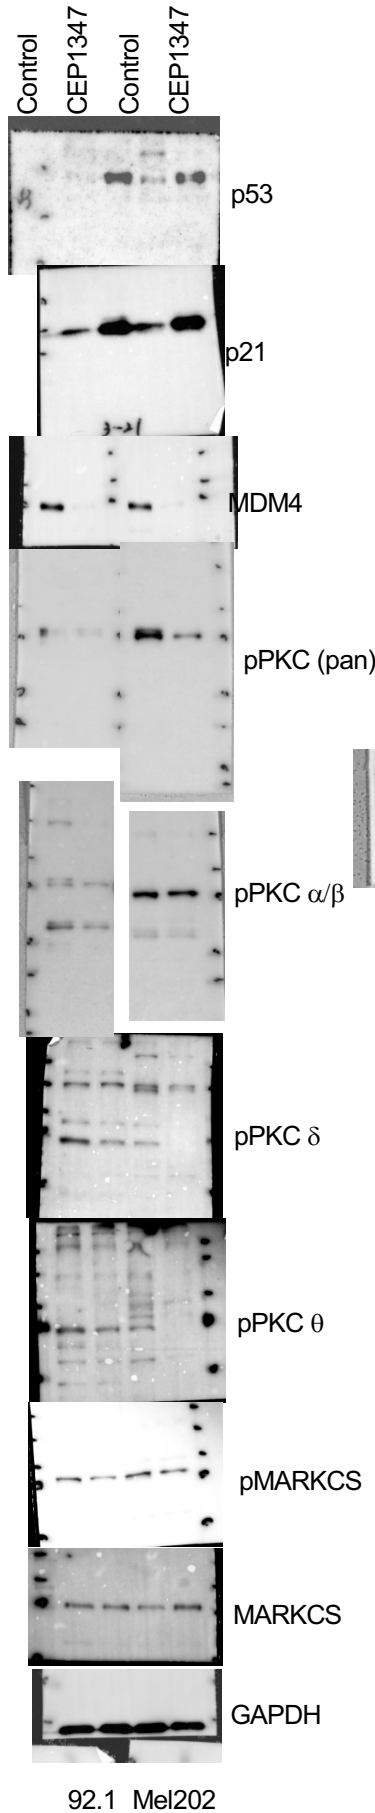

Figure 5B

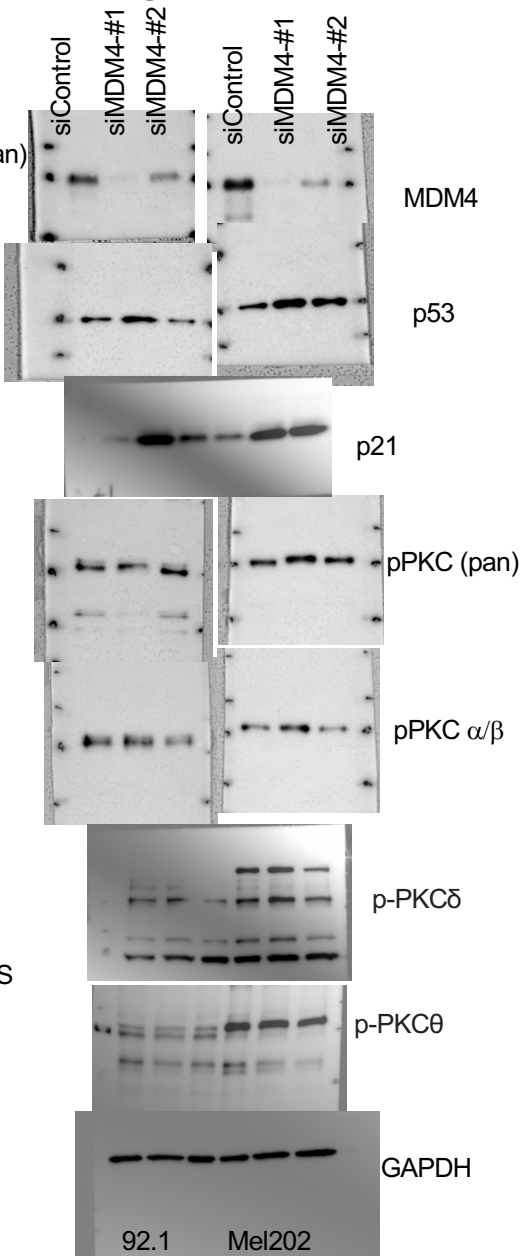

Figure 5C

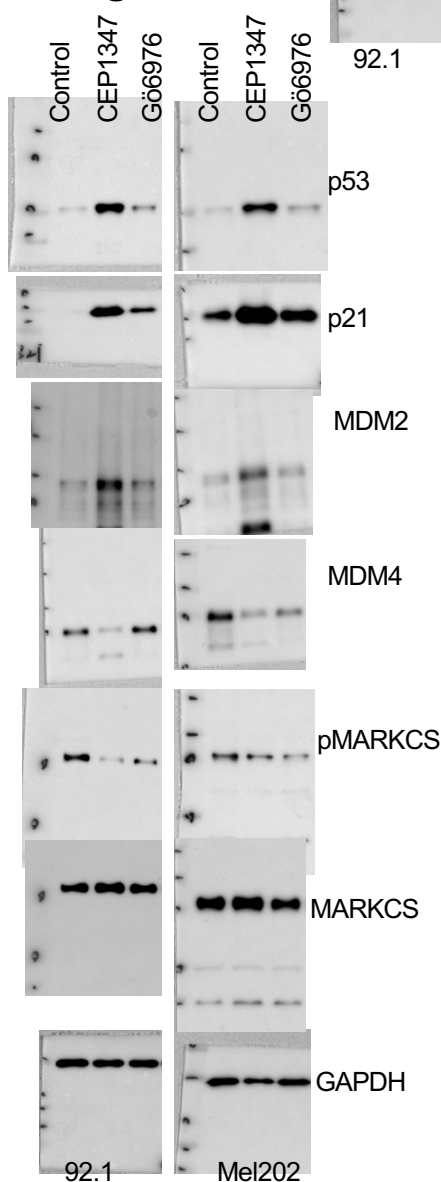

Figure 5D

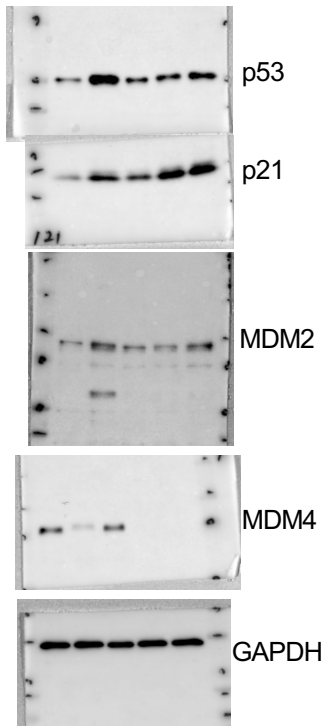

Figure S1: Original Western Blot images.
